# Supplementary material for: How to Share “A Really Good Secret”: Managing Sharing/Secrecy Tensions Around Scientific Knowledge Disclosure
Source: Atypon-hosted journal article supplement (doi:10.1287/orsc.2015.1040), 2016-02-10
Supplement: orsc.2015.1040-sm_onlineappendix-final.pdf [file orsc.2015.1040-sm_onlineappendix-final.pdf]

## ONLINE APPENDIX

### Complete Interview List and Sources

| <b>Technique</b> | <b>Name</b>          | <b>Position and Organization</b>                                  | <b>Source</b> | <b>Interview Date(s)<sup>1</sup></b> |
|------------------|----------------------|-------------------------------------------------------------------|---------------|--------------------------------------|
| rDNA             | Paul Berg            | Stanford biochemistry professor                                   | Bancroft      | 1997                                 |
| rDNA             | Mary C. Betlach      | Boyer's lab assistant at UCSF                                     | Bancroft      | 1994                                 |
| rDNA             | Herb Boyer           | Co-inventor, UCSF professor, Genentech founder                    | Bancroft      | 1994                                 |
| rDNA             | Ronald Cape*         | Cetus Co-Founder                                                  | Bancroft      | 2003                                 |
| rDNA             | Stanley Cohen        | Co-inventor, Stanford professor                                   | Bancroft      | 1995                                 |
| rDNA             | Roberto Crea         | DNA chemist, Genentech co-founder                                 | Bancroft      | 2002                                 |
| rDNA             | David V. Goeddel     | Genetech scientist, Tularik CEO                                   | Bancroft      | 2001, 2002                           |
| rDNA             | James Gower          | Business development at Genentech                                 | Bancroft      | 2004                                 |
| rDNA             | William Green        | General counsel, Chiron                                           | Bancroft      | 2005                                 |
| rDNA             | Herbert L. Heyneker  | UCSF & Genentech molecular geneticist                             | Bancroft      | 2002                                 |
| rDNA             | Irving Johnson       | Eli Lilly (VP Research) and Genentech                             | Bancroft      | 2004                                 |
| rDNA             | Thomas D. Kiley      | Genentech VP and legal counsel, entrepreneur                      | Bancroft      | 2000, 2001                           |
| rDNA             | Dennis G. Kleid      | Scientist and patent agent at Genentech                           | Bancroft      | 2001                                 |
| rDNA             | Arthur Kornberg      | Stanford biochemist, DNAX cofounder, Nobel prize winner           | Bancroft      | 1997                                 |
| rDNA             | Daniel Koshland, Jr. | Professor of immunology, UC Berkeley                              | Bancroft      | 1998                                 |
| rDNA             | Laurence Lasky       | Genentech scientist                                               | Bancroft      | 2003                                 |
| rDNA             | David Martin         | UCSF and Genentech                                                | Bancroft      | 2004                                 |
| rDNA             | Edward E. Penhoet    | Chiron CEO and UC Berkeley Public Health Dean                     | Bancroft      | 1998                                 |
| rDNA             | Diane Pennica        | Genentech scientist                                               | Bancroft      | 2003                                 |
| rDNA             | George Rathman       | Amgen CEO                                                         | Bancroft      | 2003                                 |
| rDNA             | Arthur Riggs         | Director of the Beckman Research Institute, City of Hope hospital | Bancroft      | 2005                                 |
| rDNA             | Steven Rosenberg     | Chiron scientist                                                  | Bancroft      | 1992                                 |
| rDNA             | William J. Rutter    | UCSF, Chiron                                                      | Bancroft      | 1992                                 |
| rDNA             | Richard H. Scheller  | Columbia, Stanford, Genentech research director                   | Bancroft      | 2001, 2002                           |
| rDNA             | Robert A. Swanson    | Genentech co-founder                                              | Bancroft      | 1997                                 |
| rDNA             | Axel Ullrich         | Genentech scientist                                               | Bancroft      | 1994, 2003                           |
| rDNA             | Daniel G. Yansura    | Genentech senior scientist                                        | Bancroft      | 2001                                 |
| rDNA             | William Young        | Lilly, Genentech Director of Manufacturing and COO                | Bancroft      | 2004                                 |
| rDNA             | (Personal 01)*       | Professor of pharmacology, major Midwestern university            | Personal      | 2008                                 |

| <b>Technique</b> | <b>Name</b>         | <b>Position and Organization</b>                           | <b>Source</b> | <b>Interview Date(s)</b> |
|------------------|---------------------|------------------------------------------------------------|---------------|--------------------------|
| rDNA             | (Personal 02)*      | Biochemistry PhD student, major West Coast university      | Personal      | 2006                     |
| rDNA             | (Personal 03)*      | Lab technician, major West Coast university                | Personal      | 2007                     |
| rDNA             | (Personal 04)*      | Lab technician, major West Coast university                | Personal      | 2007                     |
| rDNA             | (Personal 05)*      | Independent industry consultant                            | Personal      | 2007                     |
| rDNA             | (Personal 06)*      | Co-founder and chief scientist, biotech startup            | Personal      | 2006                     |
| rDNA             | (Personal 07)*      | Research associate, major biotech                          | Personal      | 2008                     |
| rDNA             | (Personal 08)       | Technology licensing director, major West Coast university | Personal      | 2009                     |
| rDNA             | (Personal 09)*      | PostDoc, major West Coast university                       | Personal      | 2009                     |
| rDNA             | (Personal 10)*      | Researcher, major biotech firm                             | Personal      | 2010                     |
| PCR              | Norman Arnheim      | SUNY, Cetus, USC                                           | Smithsonian   | 1992                     |
| PCR              | John G. Atwood      | Senior scientist, Perkin-Elmer                             | Smithsonian   | 1993                     |
| PCR              | Ronald Cape*        | Cetus and UC Berkeley                                      | Bancroft      | 2003                     |
| PCR              | Henry Erlich        | Cetus scientist                                            | Smithsonian   | 1992                     |
| PCR              | David H. Gelfand    | VP, Director, Senior Scientist Cetus, Roche                | Smithsonian   | 1992                     |
| PCR              | Donald Glaser       | Cetus co-founder, Chiron, UC Berkeley professor            | Bancroft      | 2003, 2004               |
| PCR              | Lawrence Allen Haff | Perkin-Elmer principal scientist                           | Smithsonian   | 1993                     |
| PCR              | Elena D. Katz       | Perkin-Elmer senior staff scientist                        | Smithsonian   | 1993                     |
| PCR              | Shirley Kwok        | Cetus scientist                                            | Smithsonian   | 1992                     |
| PCR              | Kary Mullis         | Inventor, Cetus                                            | Smithsonian   | 1992                     |
| PCR              | Enrico Picozza      | Perkin-Elmer senior technical specialist                   | Smithsonian   | 1993                     |
| PCR              | Riccardo Pigliucci  | President of Perkin-Elmer instrument group                 | Smithsonian   | 1993                     |
| PCR              | Randall K. Saiki    | Research associate Cetus, Research investigator Roche      | Smithsonian   | 1992                     |
| PCR              | Stephen Scharf      | Research associate Cetus, senior scientist Roche           | Smithsonian   | 1992                     |
| PCR              | John Sninsky        | Director of Research for Cetus PCR division                | Smithsonian   | 1992                     |
| PCR              | Michael Urdea       | Senior Scientist at Chiron                                 | Bancroft      | 1992                     |
| PCR              | Tom White           | Roche VP of R&D, Senior director of research at Cetus      | Smithsonian   | 1992                     |
| PCR              | (Personal 01)*      | Professor of pharmacology, major Midwestern university     | Personal      | 2008                     |
| PCR              | (Personal 02)*      | Biochemistry PhD student, major West Coast university      | Personal      | 2006                     |
| PCR              | (Personal 03)*      | Lab technician, major West Coast university                | Personal      | 2007                     |

| <b>Technique</b> | <b>Name</b>      | <b>Position and Organization</b>                                 | <b>Source</b> | <b>Interview Date(s)</b> |
|------------------|------------------|------------------------------------------------------------------|---------------|--------------------------|
| PCR              | (Personal 04)*   | Lab technician, major West Coast university                      | Personal      | 2007                     |
| PCR              | (Personal 05)*   | Independent industry consultant                                  | Personal      | 2007                     |
| PCR              | (Personal 06)*   | Co-founder and chief scientist, biotech startup                  | Personal      | 2008                     |
| PCR              | (Personal 07)*   | Research associate, major biotech                                | Personal      | 2008                     |
| PCR              | (Personal 09)*   | PostDoc, major West Coast university                             | Personal      | 2009                     |
| PCR              | (Personal 10)*   | Researcher, major biotech firm                                   | Personal      | 2010                     |
| PCR              | (Personal 11)    | Senior executive, major scientific instruments firm              | Personal      | 2005                     |
| PCR              | (Personal 12)    | Lab technician, major West Coast university                      | Personal      | 2007                     |
| PCR              | (Personal 13)    | Lab technician, major West Coast university                      | Personal      | 2007                     |
| PCR              | (Personal 14)    | PhD student in chemistry, major West Coast university            | Personal      | 2007                     |
| PCR              | (Personal 15)    | Professor of chemistry, major West Coast university              | Personal      | 2008                     |
| PCR              | (Personal 16)    | Lab technician, mid-size biotech                                 | Personal      | 2008                     |
| PCR              | (Personal 17)    | Chemistry PhD student, major West Coast university               | Personal      | 2009                     |
| PM               | Craig Anderton   | Engineer, composer                                               | NAMM          | 2005                     |
| PM               | Ray Kurzweil     | Kurzweil founder and engineer                                    | NAMM          | 2007                     |
| PM               | Thomas Oberheim  | Oberheim founder and engineer                                    | NAMM          | 2005                     |
| PM               | Jeff Rona        | Innovator, composer                                              | NAMM          | 2005                     |
| PM               | Dave Smith       | Sequential Circuits founder and engineer                         | NAMM          | 2005                     |
| PM               | John Worthington | Manager of Advanced Music Group, Apple                           | NAMM          | 2007                     |
| PM               | (Personal 18)    | Professor of music, major West Coast university                  | Personal      | 2005, 2008               |
| PM               | (Personal 19)    | Professor of music, major West Coast university                  | Personal      | 2002                     |
| PM               | (Personal 20)    | Licensing Associate, major West Coast university                 | Personal      | 2004                     |
| PM               | (Personal 21)    | Senior executive, digital music startup                          | Personal      | 2004                     |
| PM               | (Personal 22)    | Audio engineer, major semiconductor firm                         | Personal      | 2004                     |
| PM               | (Personal 23)    | Professor of music, major West Coast university                  | Personal      | 2004, 2007, 2008         |
| PM               | (Personal 24)    | Professor of electrical engineering, major West Coast university | Personal      | 2005                     |
| PM               | (Personal 25)    | Independent consultant                                           | Personal      | 2004                     |
| PM               | (Personal 26)    | Research associate, major West Coast university                  | Personal      | 2004                     |

| <b>Technique</b> | <b>Name</b>       | <b>Position and Organization</b>                              | <b>Source</b> | <b>Interview Date(s)</b> |
|------------------|-------------------|---------------------------------------------------------------|---------------|--------------------------|
| PM               | (Personal 27)     | Audio engineer, mid-size digital music firm                   | Personal      | 2006                     |
| PM               | (Personal 28)     | Licensing Associate, major West Coast university              | Personal      | 2005                     |
| PM               | (Personal 29)     | Research associate, major West Coast university               | Personal      | 2009                     |
| PM               | (Personal 30)     | Audio engineer, multinational musical instruments firm        | Personal      | 2008                     |
| PM               | (Personal 31)     | PhD student, major West Coast university                      | Personal      | 2008                     |
| PM               | (Personal 32)     | Audio engineer, multinational musical instruments firm        | Personal      | 2008                     |
| PM               | (Personal 33)*    | Independent consultant                                        | Personal      | 2009                     |
| PM               | (Personal 34)     | Software engineer, multinational software firm                | Personal      | 2009                     |
| PM               | (Personal 35)     | Audio engineer, boutique digital music firm                   | Personal      | 2012                     |
| PAC              | C. Sydney Burrus  | Professor, Rice University                                    | IEEE          | 1998                     |
| PAC              | Alfred Fettweis   | Engineer, ITT, Siemens                                        | IEEE          | 1997                     |
| PAC              | Fumitada Itakura  | Engineer, NTT                                                 | IEEE          | 1997                     |
| PAC              | William Lang      | IBM                                                           | IEEE          | 1997                     |
| PAC              | Alan V. Oppenheim | Professor of electrical engineering and computer science, MIT | IEEE          | 1997                     |
| PAC              | Thomas Parks      | Professor of electrical engineering, Rice and Cornell         | IEEE          | 1998                     |
| PAC              | Ron Schafer       | Bell Labs, Professor at Georgia Tech                          | IEEE          | 1998                     |
| PAC              | Manfred Schroeder | Engineer, Bell Labs                                           | IEEE          | 1994                     |
| PAC              | (Personal 33)*    | Independent consultant                                        | Personal      | 2009                     |
| PAC              | (Personal 36)     | Senior engineer, major audio firm                             | Personal      | 2005                     |
| PAC              | (Personal 37)     | Engineer, major German research institute                     | Personal      | 2005                     |
| PAC              | (Personal 38)     | Licensing Director, major mass media firm                     | Personal      | 2005                     |
| PAC              | (Personal 39)     | Consulting professor, major West Coast university             | Personal      | 2008                     |
| PAC              | (Personal 40)     | Engineer, major audio firm                                    | Personal      | 2008                     |
| PAC              | (Personal 41)     | Engineer, Internet radio startup                              | Personal      | 2006                     |
| PAC              | (Personal 42)     | Engineer, major consumer technology firm                      | Personal      | 2007                     |
| PAC              | (Personal 43)     | Lead engineer, digital music startup                          | Personal      | 2006                     |
| PAC              | (Personal 44)     | Independent consultant                                        | Personal      | 2009                     |
| PAC              | (Personal 45)     | Audio engineer, multinational consumer technology company     | Personal      | 2007                     |
| PAC              | (Personal 46)     | PhD student, major West Coast university                      | Personal      | 2008                     |

<sup>1</sup> In the case of the oral histories, note that dates in the references may not match dates in this Online Appendix. The date in the Appendix refers to the interview date, while the date in the references refers to the publication date for the oral history. Typically, there is a lag as the oral historians reviewed the transcripts with the subjects.

\* indicates interviews that addressed more than one technique. These interviews are listed alongside each relevant technique.
